# Supplementary material
Source: PubMed Central journal article supplement (PMC4258769)
Supplement: supp_dyu020_ije-2013-07-0655-File003.pdf [file supp_dyu020_ije-2013-07-0655-File003.pdf]

# International Journal of Epidemiology

## Authorship of Papers

We need to be sure that all authors of IJE papers meet the criteria of authorship agreed by the International Committee of Medical Journal Editors (see [www.icmje.org](http://www.icmje.org)). We also want to be sure that there is no-one who meets such criteria who is not listed as an author.

Please therefore read the criteria listed below and sign and return the form.

**“Each author should have participated sufficiently in the work to take public responsibility for the content. Authorship credit should be based only on substantial contributions to a) conception and design, or analysis and interpretation of data; and b) drafting the article or revising it critically for important intellectual content; and c) final approval of the version to be published. Conditions a), b), and c) must all be met. Participation solely in the acquisition of funding or the collection of data does not justify authorship. General supervision of the research group is not sufficient for authorship.”**

No. of Paper: IJE-2013-07-0655

Title: Periconceptional Folic Acid

Supplementation and Risk of Preterm Birth in China—A Large Prospective Cohort Study

All the authors listed on this paper meet the criteria set down by the International Committee of Medical Journal Editors and have seen and approved the final manuscript. No-one who might consider that he or she has a right to be an author has been excluded.

Name

Signature

Zhiwen Li

Zhiwen Li

Rongwei Ye

Rongwei Ye

Le Zhang

Le Zhang

Hongtian Li

Hongtian Li

Jianmeng Liu

Jianmeng Liu

Aiguo Ren

Aiguo Ren

Corresponding author:

Rongwei Ye
